1 **Isotope effects on radical pair performance in cryptochrome: a**  
2 **new hypothesis for the evolution of animal migration**

3

4 **Ismael Galván<sup>1</sup>, Abbas Hassasfar<sup>2</sup>, Betony Adams<sup>2,3</sup> and Francesco**  
5 **Petruccione<sup>2,4,5</sup>**

6

7 <sup>1</sup>Department of Evolutionary Ecology, National Museum of Natural Sciences, CSIC, 28006  
8 Madrid, Spain.

9 <sup>2</sup>Quantum Research Group, School of Chemistry and Physics, University of KwaZulu-Natal,  
10 Durban 4001, South Africa.

11 <sup>3</sup>The Guy Foundation, Beaminster, DT8 3HY Dorset, UK.

12 <sup>4</sup>School for Data Science and Computational Thinking, Stellenbosch University,  
13 Stellenbosch 7600, South Africa.

14 <sup>5</sup>National Institute for Theoretical and Computational Sciences (NITheCS), Stellenbosch  
15 7600, South Africa.

16

17 **ORCID:**

18 Ismael Galván: 0000-0002-6523-8592; Abbas Hassasfar: 0000-0003-1079-8848; Betony  
19 Adams: 0000-0001-9746-5442; Francesco Petruccione: 0000-0002-8604-0913.

20

21 **Authors for correspondence:**

22 Ismael Galván

23 e-mail: [galvan@mncn.csic.es](mailto:galvan@mncn.csic.es)

24 Abbas Hassasfar

25 e-mail: [omid.hassasfar@gmail.com](mailto:omid.hassasfar@gmail.com)

26 **Abstract**

27 Mechanisms occurring at the atomic level are now known to drive processes essential for  
28 life, as revealed by quantum effects on biochemical reactions. Some macroscopic  
29 characteristics of organisms may thus show an atomic imprint, which may be transferred  
30 across organisms and affect their evolution. This possibility is considered here for the first  
31 time, with the aim of elucidating the appearance of an animal innovation with an unclear  
32 evolutionary origin: migratory behaviour. This trait may be mediated by a radical pair (RP)  
33 mechanism in the retinal flavoprotein cryptochrome, providing essential magnetic orientation  
34 for migration. Isotopes may affect the performance of quantum processes through their  
35 nuclear spin. Here, we consider a simple model and then apply the standard open quantum  
36 system approach to the spin dynamics of cryptochrome RP. We changed the spin quantum  
37 number ( $I$ ) and g-factor of hydrogen and nitrogen isotopes to investigate their effect on RP's  
38 yield and magnetic sensitivity. Strong differences arose between isotopes with  $I=1$  and  $I=1/2$   
39 in their contribution to cryptochrome magnetic sensitivity, particularly regarding Earth's  
40 magnetic field strengths (25-65  $\mu\text{T}$ ). In most cases, isotopic substitution improved RP's  
41 magnetic sensitivity. Migratory behaviour may thus have been favoured in animals with  
42 certain isotopic compositions of cryptochrome.

43 **Keywords: animal migration, birds, Isotopic Resonance Hypothesis, nuclear spin**  
44 **effects, quantum biology, radical pairs, stable isotopes.**

45

46

47

48

49

50

## 51 **1. Introduction**

52 Life depends upon interactions between the constituent molecules of organisms. Isolated  
53 molecules are inanimate. But the physicochemical characteristics of biomolecules, which  
54 determine their interactions, are given by their constituent atoms [1]. Life therefore occurs,  
55 to some extent, at an atomic scale. Not all atoms of a given element are equal: elements  
56 occur as isotopes, i.e., atoms of the same element that differ in the number of neutrons in  
57 their nuclei, thus having different mass numbers and nuclear spins. The isotopic composition  
58 of molecules might be transferred across molecules, and across organisms, during  
59 molecular biosynthesis independently of the genetic code, as nucleic acids cannot  
60 determine their own isotopic composition [2]. Atomic properties like this may be responsible  
61 for some macroscopic characteristics of organisms, but this possibility has been only  
62 envisaged by some authors [3-5]. However, if the isotopic composition of biomolecules is  
63 responsible for macroscopic characteristics of organisms, this may have profound  
64 consequences for organic evolution.

65 Different isotopic compositions of the same molecule (i.e., isotopologues) do not  
66 behave equally in some chemical reactions [6]. Stable isotopes, i.e., those not undergoing  
67 radioactive decay, are particularly relevant for organisms, because the nuclei of the most  
68 common biological elements (C, H, O, N and S) exist as 13 stable isotopes, making those  
69 biomolecules appear as mixed isotopologues. The different mass numbers of these stable  
70 isotopes give them slightly different properties, leading to their partial separation during  
71 chemical, biological and physical transformations in what is termed isotope fractionation.  
72 Fractionation occurs because of the influence in chemical reactions of the different masses  
73 (nuclei with more neutrons are heavier), volumes (nuclei with more neutrons are bigger) and  
74 spins (nuclei with certain spin values have a magnetic moment) of isotopes [7]. This explains  
75 the distribution of isotopes in the biosphere, as fractionation occurs first in the environment,  
76 then during plant photosynthesis, and lastly during animal metabolic reactions [8].

77 Different experiments have proved that organisms grown under certain isotopic  
78 media or given diets with certain isotopes experience oxidative stress and resistance to  
79 change the isotopic composition of their tissues [9]. This has been observed at all levels of  
80 complexity, from microorganisms to vertebrates such as birds and humans, and in isotopes  
81 of elements such as H, C and N [10-12]. These studies indicate that organisms have a  
82 preferred isotopic environment, because there is an optimum isotopic composition of  
83 molecules under which biochemical reactions accelerate [9,13,14]. Concomitantly, an  
84 evolutionary optimization explains the negative physiological effects that organisms  
85 experience under deviations of their isotopic composition, even if adaptation can be  
86 achieved [9]. Chemical and evolutionary optimizations thus make likely that every organism  
87 has a specific isotopic profile that is not randomly determined by environmental influences.

88 Yet, a small proportion of variation in the isotopic composition of animals is due to the  
89 incorporation of isotopes with the food [15,16]. Ecological studies even assume that the  
90 whole-body composition of an animal closely resembles that of its diet when tracking the  
91 trophic behavior of animal groups within a given species [8]. This is used to infer the trophic  
92 niche (isotopic niche or "isospace") of species of animals by plotting the composition of  
93 certain tissues in C isotopes against that of N isotopes. Isospaces show significantly  
94 differentiated, characteristic isotopic compositions of many species of animals, including  
95 hominids [17,18]. Importantly, isospaces do not overlap even between coexisting species  
96 that are morphologically and ecologically similar [19]. This supports the idea that, even  
97 considering the dietary source of variability in the isotopic composition of animals, every  
98 species may have a characteristic isotopic composition. This actually agrees with the  
99 existence of niche conservatism, i.e. the retention of ecological traits in species across  
100 space and time, as revealed by non-overlapping isospaces in ecologically similar species of  
101 animals [19,20]. These differentiated isospaces of animals have never been considered an  
102 intrinsic trait of species, but here it is hypothesized that the isotopic composition of molecules

103 might be more similar within animals belonging to the same species than between animals  
104 of different species (i.e., interspecific variability > intraspecific variability). Indeed, even if  
105 part of variation in the isotopic composition of animals is due to dietary incorporations,  
106 individuals of the same species share biochemical reactions of metabolism, thus  
107 experiencing isotope fractionation processes that must be more similar than in individuals  
108 of other species, which possess different metabolic profiles. This is because metabolic  
109 pathways are shared by all individuals of the same species, an observation that has allowed  
110 the development of metabolomics, in a similar way as genomics, as a useful tool to elucidate  
111 the evolution of species-specific traits in organisms [21,22]. Certain isotopic compositions in  
112 certain species may therefore favour some biochemical reactions and thus promote the  
113 evolution of important phenotypic traits.

114         The development of the field of quantum biology suggests that biochemical reactions  
115 involved in physiological processes are mediated by quantum mechanisms [23,24]. One  
116 such mechanism is represented by radical pairs (RP), which are strongly influenced by  
117 isotopes [25] and are potentially responsible for animal magnetoreception: the ability to  
118 perceive the Earth's magnetic field and use it to orientate during migratory movements. This  
119 ability is most notably observed in birds, but has evolved in all major vertebrate groups and  
120 some invertebrates [26,27]. The mechanism of magnetoreception and the ability for  
121 magnetic orientation was proposed to be mediated by a light-initiated RP in the eyes of birds,  
122 whose recombination disruption by the magnetic field is recognized by the bird's nervous  
123 system [28]. This is currently the leading theory of avian magnetoreception. Cryptochrome  
124 4 (CRY4), a pigment belonging to the only vertebrate protein class that forms radical pairs  
125 upon photo-excitation (flavoproteins), has been suggested to be the likely magnetoreceptive  
126 protein, localized in double-cones and long-wavelength single cones in the retina of birds  
127 [29]. Recent research has demonstrated that the photochemistry of CRY4 in night-migratory  
128 birds is more magnetically sensitive than that of some non-migratory species [30]. However,

129 the exact type of cryptochrome responsible for magnetoreception remains a subject of  
130 debate. There are five different types of cryptochrome found in birds' retinas. In addition to  
131 CRY4, cryptochrome 1a (CRY1a) has been put forward as the likely site for a light-sensitive  
132 magnetic compass, due to its specific location in the outer segments of the ultraviolet cone  
133 cells of birds [31]. The majority of research into the role of RPs in magnetoreception has  
134 focused on birds. The RP mechanism could, however, be the same in other animals with  
135 magnetic orientation capabilities, as the expression of magneto-sensitive cryptochrome has  
136 been shown to occur in the retina of insects [32], and even of humans [33]. The capacity for  
137 magnetic orientation has also been shown to reside in the eyes of other mammals [34].

138 In its simplest iteration, an RP consists of two radicals (molecules with an odd number  
139 of electrons) that have been created simultaneously by chemical bond breaking or light-  
140 induced electron transfer, forming a spatially separated but spin-correlated and possibly  
141 entangled electron pair. This entanglement is due to the fact that the RP is often assumed  
142 to be created in a singlet, or maximally entangled state, although other options have been  
143 discussed [35]. Due to external and local (hyperfine interaction) magnetic fields, the spin  
144 character of the radical pair is coherently interconverted between singlet (anti-parallel  
145 electron spins) and triplet (parallel electron spins) states [36]. The spin state of the electron  
146 (as a purely quantum mechanical concept) then influences subsequent chemical reactions,  
147 converting information about the magnetic environment into a chemical signature. As  
148 outlined previously, this mechanism has been hypothesized to be responsible for  
149 magnetoreception in birds: cryptochrome in the retina is photoexcited by light, forming an  
150 RP that is initially in the singlet state and is interconverted between singlet and triplet states  
151 by hyperfine coupling. The rate of recombination of singlet states also depends on the  
152 orientation of the Earth's magnetic field, and the interconversion is oscillatory coherent,  
153 generating a quantum beat that is used by birds for orientation [37]. See Figure 1 for details  
154 of the RP formation.

155 Magnetoreception in birds is strongly believed to be an RP mechanism based on  
156 retinal cryptochrome [38]. However, the strong influence that isotopes exert on RP  
157 mechanisms has been largely overlooked, with the exception of Player and Hore [39]. This  
158 influence is due to the fact that one of the dominant interactions involved in RP dynamics is  
159 the internal magnetic interactions, known as hyperfine interactions, which are caused by the  
160 surrounding nuclear spins that can interact with an unpaired electron. Nuclei can have no  
161 spin (e.g.,  $^{12}\text{C}$  and  $^{16}\text{O}$ ), integer spin (e.g.,  $^{14}\text{N}$  and  $^2\text{H}$ ) and also half-integer spin (e.g.,  $^{13}\text{C}$   
162 and  $^1\text{H}$ ) [40]. Thus, different isotopes of an element can have different magnetic effects on  
163 the dynamics of the system. An RP with isotopes with certain spin undergoes fast triplet-  
164 singlet conversion, while this is strongly delayed in the case of isotopes with other spins [25].  
165 Cryptochrome molecules with isotopes with certain spin numbers might thus impair the RP  
166 mechanism, which might be favoured in cryptochrome isotopologues with other spin  
167 numbers (Figure 1). The ability for magnetic orientation and long-distance migration may  
168 therefore be more likely to arise in animals that have inherited cryptochrome molecules with  
169 higher proportions of isotopes with certain spin numbers.

170 Here we hypothesize that the ability to conduct long-distance migration has evolved  
171 only in animals with a prevailing contribution of isotopes with certain spin to the  
172 cryptochrome molecule. To evaluate the potential of this hypothesis to explain interspecific  
173 variability in migratory ability, we modeled spin dynamics of the broadly accepted RP model  
174 of the cryptochrome-based avian compass.

175

## 176 **2. Methods**

177 We considered two different theoretical scenarios to investigate our hypothesis. Both involve  
178 the conventional radical pair approach, though there is some suggestion that adding a third  
179 radical improves the performance of the radical-based compass [41]. In the first scenario  
180 (**Scenario 1**), we explored a simple model with one hyperfine-coupled nucleus for the

181 calculation of the magnetic sensitivity (MS) of cryptochrome depending on different quantum  
182 spin numbers associated to different nuclei. We explored MS in a different range of  
183 anisotropic hyperfine coupling constants in the presence of an external magnetic field,  
184 similar to the Earth's geomagnetic field. The second scenario (**Scenario 2**) looks more  
185 closely at isotope substitution of the specific model by changing the spin quantum number  
186 and also the g-factor for scaling the strength of hyperfine interaction for different  
187 geomagnetic field intensities. In this second scenario, we used the DFT calculations of  
188 nuclear hyperfine coupling tensors by Hiscock et al. [42] for cryptochrome, in addition to a  
189 simpler version with up to three nuclei that has previously been used by Jain et al. [43] and  
190 that assumes that all hyperfine tensors are simultaneously diagonalized. In this second  
191 scenario, we show that both singlet yield and MS change with isotope substitution.

192 The spin dynamics of RPs are described by the following Hamiltonian:

$$193 \quad H = H_{\text{Zeeman}} + H_{\text{Hyperfine}} + H_{\text{Exchange}} + H_{\text{Dipolar}} + H_{\text{Nuclear}} \quad (1)$$

194 Among these five terms, the exchange, dipolar and nuclear Zeeman interactions usually are  
195 negligible as compared to the other two terms [44].

196 Two dominant interactions are conventionally taken to be involved in RP dynamics:  
197 one of them is the Zeeman interaction ( $H_{\text{Zeeman}}$ ), due to the magnetic field of an external  
198 source (e.g., the geomagnetic field). The other is due to internal magnetic interactions,  
199 known as hyperfine interactions ( $H_{\text{Hyperfine}}$ ) which are caused by the local surrounding  
200 nuclear spins that can interact with an unpaired electron. The RP Hamiltonian with one  
201 nucleus can thus be written as:

$$202 \quad H = \gamma \mathbf{B} \cdot (\hat{S}_1 + \hat{S}_2) + \hat{I} \cdot \mathbf{A} \cdot \hat{S}_1 \quad (2)$$

203 where ' $I$ ' is the nuclear spin operator,  $S_1, S_2 \in \frac{1}{2}(\sigma_x, \sigma_y, \sigma_z)$  are electron spin operators ( $\sigma_x, \sigma_y,$   
204  $\sigma_z$  are the Pauli matrices),  $\gamma = \mu_0 g$  is the gyromagnetic ratio,  $\mu_0$  is the Bohr magneton, and  $g$   
205 is the electron g factor (= 2.0023). We will consider the simplest case in which the hyperfine  
206 interaction is anisotropic,  $A = \text{diag}(0, 0, a)$  as well as the more complex case of  $A = \text{diag}(a_x,$



207  $a_y, a_z$ ). The external field (geomagnetic field) is characterized by  $B = B_0(\sin\theta\cos\phi, \sin\theta\sin\phi,$   
208  $\cos\theta)$ ;  $B_0 = 47 \mu\text{T}$  is the local geomagnetic field, and  $\theta$  is the magnetic field orientation with  
209 respect to the molecular axis [45]. These interactions dictate the dynamics of the electrons'  
210 spin state and can cause coherent conversion between singlet and triplet states.

211 Different approaches have previously been used to tackle RP dynamics and  
212 recombination. These include Haberkorn's [46] master equation, the Jones-Hore  
213 measurement master equation [47], Kominis' [48] measurement master equation approach,  
214 which commonly includes the Liouville-von Neumann equation, as well as other open  
215 quantum systems approaches [49]. There remains some debate as to which is the best  
216 approach [44]. We use the Markovian quantum master equation approach to simulate the  
217 dynamics of the RP system of cryptochrome, similar to Gauger et al. [50]. In this quantum  
218 master equation approach, which conserves probability unlike the Liouville equations, we  
219 use the 'shelving states'  $|S\rangle$  and  $|T\rangle$  to represent the singlet and triplet products that are  
220 spin-selected from the initial electronic singlet or triplet states of the RP. Mathematically, we  
221 use the direct sum to extend the Hilbert space of the radical pair to include the shelving  
222 states  $|S\rangle$  and  $|T\rangle$  as extra basis vectors. The recombination of the RP into singlet and  
223 triplet channels is modeled through decay operators. For example, for one nucleus model  
224 with  $I=1/2$ , there are eight projections, four projections for the 'up' ( $|\uparrow\rangle$ ) state of nucleus  
225  $P_{S,\uparrow} = |S\rangle\langle S, \uparrow|, P_{T_0,\uparrow} = |T\rangle\langle T_0, \uparrow|, P_{T_+,\uparrow} = |T\rangle\langle T_+, \uparrow|, P_{T_-, \uparrow} = |T\rangle\langle T_-, \uparrow|$  and, similarly, four projections  
226 for the 'down' ( $|\downarrow\rangle$ ) nuclear state  $P_{S,\downarrow} = |S\rangle\langle S, \downarrow|, P_{T_0,\downarrow} = |T\rangle\langle T_0, \downarrow|,$   
227  $P_{T_+,\downarrow} = |T\rangle\langle T_+, \downarrow|, P_{T_-, \downarrow} = |T\rangle\langle T_-, \downarrow|$  [49]. The singlet yield is defined as the proportion of  
228 recombined chemical products originating from the singlet precursor. One of the two events  
229 will occur, and the final populations of  $|S\rangle$  and  $|T\rangle$  give the singlet and triplet yield.

230 The standard, GKSL (Gorini–Kossakowski–Sudarshan–Lindblad equation) master  
231 equation can be defined as [51]:

$$\dot{\rho} = -\frac{i}{\hbar}[H, \rho] + k_s \sum_{i=1}^N P_i \rho P_i^\dagger - \frac{1}{2}(P_i^\dagger P_i \rho + \rho P_i^\dagger P_i) + k_t \sum_{i=1}^M P_i \rho P_i^\dagger - \frac{1}{2}(P_i^\dagger P_i \rho + \rho P_i^\dagger P_i) + L(\rho) \quad (3)$$

where  $P_i$  are the projections on singlet and triplet, and N and M are the number of projection operators into singlet and triplet that depend on the Hilbert space of the nucleus. In the case of one nucleus with  $I=1/2$ , then  $N=2$  and  $M=6$ , but in the case of one nucleus with  $I=1$ , then  $N=3$  and  $M=9$ .  $L(\rho)$  is the standard Lindblad dissipator, used here to describe noise in the system. Several different noise models have previously been proposed, with different noise rates [50,52]. Here, we do not aim to explore all of the different noise models. As an important example we consider a special type of noise, perfectly correlated pure local dephasing noise, given by:

$$L(\rho) = \sum_{i=1,2} \Gamma \left( L_i \rho L_i^\dagger - \frac{1}{2} (L_i^\dagger L_i \rho + \rho L_i^\dagger L_i) \right), \quad L_i = \frac{\sigma_z^{(1)}}{2} + \frac{\sigma_z^{(2)}}{2}, \quad (4)$$

where  $\Gamma$  is the dephasing rate. Results suggest that with this noise model MS is quite robust and is even enhanced by the presence of correlated dephasing Cai et al. [52].

The master equation is given in terms of the rates of recombination to singlet and triplet products,  $k_s$  and  $k_t$ , where H is given in Eq. (3). The dynamics of the master equation of the RP system were calculated using the QuTiP quantum toolbox in the Python module [53], which is developed for simulating quantum systems, particularly open quantum systems.

Here, we aim at showing that isotopes react preferentially (in terms of singlet or triplet yield and MS) depending on their nuclear spin quantum number I and strength of hyperfine interaction, which is embedded in their g-factor. We thus explored the quantum spin dynamics of the RP to investigate isotope-dependent magnetic field effects in the specific system of cryptochrome.

255 We only consider the spin dynamics, neglecting any effects related to nuclear mass  
256 and volume. This is possible due to the fact that, within the Born-Oppenheimer  
257 approximation, electronic properties (such as spin density) do not depend on the nuclear  
258 mass and nuclei are considered point charges in quantum chemistry, meaning that nuclear  
259 volume is also irrelevant [54]. Therefore, we need only to change the spin quantum number  
260 and the g-factor to explore the effect of isotope substitution (we explain in section 2.1 how  
261 g-factor affects hyperfine coupling constant).

262 We made the following assumptions for the sake of simplification:

263 1. All projectors have the same recombination rates. We have used two different  
264 recombination rates:  $k_s=k_t=k=0.1 \mu\text{s}^{-1}$  and  $0.5 \mu\text{s}^{-1}$  ( $\tau = 1/k = 10 \mu\text{s}$  and  $2 \mu\text{s}$ , the lifetime of  
265 the radical pair,  $\tau$ , is defined as the reciprocal of  $k$ ) [50]. It is clear from the results that the  
266 sensitivity of the avian compass relies on the recombination rate, where a longer lifetime  
267 allows for greater singlet-triplet interconversion and resultant greater sensitivity.

268 2. One electron of the pair has no hyperfine interaction and the other electron experiences  
269 a hyperfine interaction due to the surrounding nucleus.

270 3. The initial state of our model  $\rho_0$  assigns a pure singlet state  $|s\rangle = \frac{1}{\sqrt{2}}(|\uparrow\downarrow\rangle - |\downarrow\uparrow\rangle)$  to the  
271 electrons, and a completely mixed state to the nucleus due to its interaction with the  
272 neighboring soft matter environment, initial state  $\rho(0) = \frac{I}{N} \otimes (|s\rangle\langle s|)$  where  $N$  is the dimension  
273 of the Hilbert space of the nucleus (e.g., for one nucleus with spin  $1/2$ ,  $N=2$ , one nucleus  
274 with spin  $1$ ,  $N=3$ , and so on).

275 4. Without loss of generality, the axial symmetry of the hyperfine tensor allows us to assume  
276 that  $\varphi = 0$  [50].

277 Our analyses are consistent with previous analyses of singlet yield for various  
278 hyperfine interaction strengths for different spin quantum numbers, and reproduce the  
279 sensitivity behaviour shown by Cai et al. [52] and Lee et al. [55] for cryptochrome. The

280 magnetic field effect was calculated as  $\Phi_S$ , i.e., the fractional yield of the singlet reaction  
281 product once all radical pairs have reacted.  $\Phi_S$  lies in the range [0,1] and is related to the  
282 triplet product yield by  $\Phi_T = 1 - \Phi_S$ . To quantify the effectiveness of a radical pair as a  
283 magnetic compass, we define the anisotropy of the reaction yield, i.e. MS, as  
284  $\Delta\Phi_S = \Phi_S^{\max} - \Phi_S^{\min}$  (the difference between the maximum and the minimum singlet yield as a  
285 function of the inclination). S denotes the singlet yield and the max/min are with respect to  
286 the magnetic field orientation, the difference between the maximum and minimum values of  
287  $\Phi_S$  being calculated as a function of the direction of the magnetic field vector, following the  
288 example of Lee et al. [55].

289

## 290 2.1. Isotope substitution

291 Substitution of one nucleus X, with spin quantum number I and factor  $g_n$ , by its isotope X'  
292 with I' and  $g_n'$ , changes the number of lines detected by Electron Spin Resonance  
293 Spectroscopy from (2I+1) to (2I'+1) and the coupling constant from  $a_X$  to  $a_{X'} = a_X \cdot g_n'/g_n$   
294 [56]. Thus, for example, replacing a proton ( $X = {}^1H = H; I = 1/2; g_n = 5.5854$ ) by a deuteron  
295 ( $X = {}^2H = D; I = 1; g_n' = 0.8574$ ) increases the number of lines from  $2 \cdot 1/2 + 1 = 2$  to  $2 \cdot 1 + 1$   
296 = 3 and decreases the coupling constant from  $a_H$  to  $a_D = a_H (0.8574/5.5854) = 0.1535 a_H$ .  
297 On the other hand, substituting a  ${}^{14}N$  nucleus ( ${}^{14}N = N = H; I = 1; g_n = 0.4038$ ) by its  ${}^{15}N$   
298 isotope ( ${}^{15}N = N'; I = 1/2; g_n' = -0.5664$ ) decreases the number of lines from  $2 \cdot 1 + 1 = 3$  to  
299  $2 \cdot 1/2 + 1 = 2$  and converts the coupling constant  $a_N$  into  $a_{N'} = a_N (-0.5664)/0.4038 = -1.4027$   
300  $a_N$  [56] (Figure 2). The properties of H and N and their isotopes are summarized in Table 1.

301 As previously stated, different isotopes of a given element can have different  
302 magnetic effects on the dynamics of the system. Apart from the spin quantum number, the  
303 strength of hyperfine interaction can be determined via the nuclear g-factor. By varying the  
304 number of nuclear spins interacting with the RP, it is possible to investigate the effects of

305 different nuclear environments and thus draw some conclusions about the structure of  
306 cryptochrome, the biomolecule in which it is thought that the RP reaction takes place.

307

### 308 **3. Results**

309 **3.1. Scenario 1.** In this scenario, the only difference between the treatment of nuclei in the  
310 model lies in their spin quantum numbers, meaning that we investigate MS with respect to  
311 the hyperfine coupling of a single nucleus model for two different spin quantum numbers  
312 ( $I=1$  and  $I=1/2$ ). We also consider only the simplest type of anisotropy, with  $A = (0, 0, a)$ . In  
313 this simplest case, we do not include noise in the model. The results of calculations of MS  
314 for different strengths of anisotropic hyperfine coupling are shown in Figure 3 and show a  
315 marked advantage for spin  $I=1/2$  than  $I=1$ . These results are also useful in that they give us  
316 an idea of the best and worst hyperfine coupling strengths with respect to magnetic  
317 sensitivity, albeit in the limited case of simple anisotropy.

318 In Figure 4 we again investigate MS for the two different spin numbers across a range  
319 of hyperfine coupling strengths, but in this instance we have included noise in the model. As  
320 previously specified, our aim was not to investigate the effects of different noise models.  
321 Given the calculations by Cai et al. [52] it appears that a specific noise model, such as a  
322 perfectly correlated dephasing model, may increase the performance of a chemical  
323 compass. We were interested in the effects that this noise model would have on radical pair  
324 dynamics for different isotopes. With noise incorporated into the model according to Eq. (4)  
325 with  $\Gamma = k - 3k$  for one nucleus with  $I=1/2$ , the maximum MS increases from 0.388  
326 (corresponding to a hyperfine coupling strength of 17.4  $\mu\text{T}$ ) to 0.411 (corresponding to a  
327 hyperfine coupling strength of 20.9  $\mu\text{T}$ ). For one nucleus with  $I=1$ , the maximum MS  
328 increases from 0.259 (corresponding to a hyperfine coupling strength of 8.7  $\mu\text{T}$ ) to 0.274  
329 (corresponding to a hyperfine coupling strength of 10.6  $\mu\text{T}$ ).

330

331 **3.2. Scenario 2.** For this second scenario we used the data provided by Jain et al. [43],  
332 summarized in Table 2. These authors used three nuclei for each RP of cryptochrome (three  
333 nuclei for FAD<sup>•-</sup> and three nuclei for TrpH<sup>•+</sup>) instead of 11 nuclei for each RP as usually  
334 considered when investigating hyperfine coupling. For our purposes we focus specifically  
335 on the hydrogens H6 and H1 as well as the nitrogens N10 and N1 to compare results for  
336 isotopic substitution, see Table 2 for details.

337  
338 **3.2.1. Scenario 2a.** We investigated singlet yield with respect to the inclination (angle  
339 describing the orientation of magnetic field to the basis of the hyperfine tensor) of different  
340 N and H isotopes in the RP [FAD<sup>•-</sup> - TrpH<sup>•+</sup>] of the cryptochrome molecule, and explored the  
341 effect of isotope substitution. The results of these models are shown in Figure 5. It is clear  
342 that isotopes with integer spin have consistently higher singlet yield than half integer, even  
343 when taking into account their different coupling constants.

344 Similar conclusions are obtained when investigating a two-nuclei model instead of  
345 single nuclear spin coupled to one of the electrons (Figure 6). In the two-nuclei model, there  
346 are four different combinations of isotopes: <sup>1</sup>H<sup>14</sup>N, <sup>1</sup>H<sup>15</sup>N, <sup>2</sup>H<sup>14</sup>N and <sup>1</sup>H<sup>15</sup>N. The Hamiltonian  
347 now gains an additional hyperfine term:

348 
$$H = \gamma \mathbf{B} \cdot (\hat{S}_1 + \hat{S}_2) + \hat{I}_1 \cdot \mathbf{A}_2 \cdot \hat{S}_1 + \hat{I}_2 \cdot \mathbf{A}_2 \cdot \hat{S}_1$$

349 Singlet yield is an interesting feature to consider with respect to RPs in the biological  
350 context. In addition to magnetoreception, singlet yield has been used to investigate a  
351 number of other biological functions which may depend on radical reactions. In reactions  
352 involving reactive oxygen species, singlet yield might be used as an indication of oxidative  
353 stress. The strong isotope dependence of singlet yield demonstrated in our results is  
354 potentially interesting with respect to observations that isotopic changes in diet lead to  
355 oxidative stress [9].

356

357 **3.2.2. Scenario 2b.** Here we investigated MS with respect to the strength of Earth's  
358 magnetic field of different N and H isotopes in the RP [FAD<sup>•-</sup> - TrpH<sup>•+</sup>] and explored the  
359 effect of isotope substitution. Results are shown in Figure 7. Scenario 1 (see Figure 3)  
360 showed a clear difference between how spin number changes MS, with  $I=1/2$  conferring  
361 greater MS than  $I=1$ . However, the effect of the spin number is also dependent on the  
362 hyperfine coupling strength, with  $I=1/2$  performing best at larger coupling constants than  $I=1$ .  
363 In Scenario 2 it is more difficult to conclude that there is a favourable spin number with  
364 respect to MS. This is likely due to the influence of the specific hyperfine coupling constants.  
365 While the hyperfine coupling strength decreases with isotope substitution in hydrogen, it  
366 increases with isotope substitution in nitrogen. If we consider only the magnetic field strength  
367 relevant to migration, which is the geomagnetic field (25-65  $\mu\text{T}$ ), then for the case of both  
368 hydrogens,  $I=1$  gives greater magnetic sensitivity than  $I=1/2$ . The case is less clear for  
369 nitrogen where both  $I=1/2$  and  $I=1$  show greater MS for specific magnetic field strengths  
370 over the geomagnetic window (25-65  $\mu\text{T}$ ). This could be due to the fact that although the  
371 coupling strengths for the nitrogen isotopes are further from the ideal values, the isotopic  
372 substitution from  $I=1$  to  $I=1/2$  confers some advantage.

373

#### 374 **4. Discussion**

375 Before any definite conclusions can be made, it should be acknowledged that the model we  
376 have used is a toy model and is the simplest possible interaction of the RP. It serves,  
377 however, to illustrate the hypothesis that isotopes may play a distinct and definite role in  
378 macroscopic biological outcomes. This influence is exerted in various ways. Our theoretical  
379 results show that the spin quantum number ( $I$ ) of a nucleus in an RP strongly influences the  
380 dependency of its MS on the strength of the hyperfine coupling. Considering a wide range  
381 of hyperfine coupling values from 0 to 350  $\mu\text{T}$ , following Lee et al. [55], the maximum MS is  
382 considerably higher, and the asymptote is reached at larger hyperfine coupling values, when

383  $I=1/2$  ( $\sim 20$   $\mu\text{T}$ ) as compared to  $I=1$  ( $\sim 10$   $\mu\text{T}$ ). These ideal hyperfine coupling strengths are  
384 considerably smaller than those given for the specific nuclei of the RP mechanism, see  
385 Table 2. Whether this distinction between  $I=1/2$  and  $I=1$  can be generalized to non-integer  
386 and integer spin would depend on the inclusion of higher spin isotopes. RP performance  
387 further improves when the noise model is perfectly correlated, suggesting that RPs in  
388 cryptochrome, as well as other biological processes, might be optimized by the unavoidable  
389 noise that is present in the environment, in accordance to Bandyopadhyay et al. [57].

390 Our results for the specific RP [ $\text{FAD}^{\bullet-}$  -  $\text{TrpH}^{\bullet+}$ ] of cryptochrome also show strong  
391 differences in the dependency of the magnetic field effect (i.e., singlet yield) on inclination,  
392 between isotopes with different spin numbers ( $^1\text{H}$  vs  $^2\text{H}$  and  $^{15}\text{N}$  vs  $^{14}\text{N}$ ). In both  $\text{FAD}^{\bullet-}$  and  
393  $\text{TrpH}^{\bullet+}$  radicals, the H and N isotope with  $I=1$  (i.e.,  $^2\text{H}$  and  $^{14}\text{N}$ ) consistently experience higher  
394 singlet yield along the whole inclination range than their counterparts with  $I=1/2$ .

395 The marked isotope-dependence of singlet yield might also offer a novel explanation  
396 for isotope-induced oxidative stress, as reported in Zubarev [9]. The role that radical reaction  
397 intermediates might play in the chemistry and biology of reactive oxygen species is a  
398 growing field of research. Reactive oxygen species (ROS) include a wide variety of oxidant  
399 molecules with different properties and biological functions that range from signalling to  
400 oxidative damage [58]. In this context, the RP mechanism might give some insight.  
401 Usselman et al. show how yields of ROS in live cells are changed by RP dynamics, in  
402 particular coherent singlet-triplet mixing [59,60]. For an RP involving oxygen, the substitution  
403 of isotopes, which we have here demonstrated to change singlet yield, could thus change  
404 the balance of ROS, potentially causing oxidative stress. This is of direct relevance to the  
405 migration evolution hypothesis posed here, because migration is a physiologically costly  
406 strategy and, consequently, species of birds that conduct long-distance migration have  
407 comparatively higher levels of antioxidant resources [61]. It is likely, then, that the possible  
408 role of isotopes on the evolutionary origin of migration also leads to differences in oxidative



409 stress between migratory and non-migratory animals, something that should be explored in  
410 the future. The role that isotopes play in RP-mediated changes to singlet yield have also  
411 been investigated in a number of other biological contexts, including consciousness [62]. It  
412 would thus seem important to determine how isotopes facilitate or inhibit the development  
413 of biological functions that may confer some evolutionary advantage on an organism.

414 It is interesting to note, however, that the greater singlet yield of nuclei with  $I=1$  does  
415 not necessarily translate into greater magnetic sensitivity, as demonstrated by the results in  
416 Figure 7, for the MS of the H and N isotopes investigated in  $FAD^{*+}$  and  $TrpH^{*+}$ . We consider  
417 in particular the range of external magnetic field values corresponding to the geomagnetic  
418 field (25-65  $\mu$ T). For both hydrogens, in contrast to the results given by the simple case  
419 investigated in Scenario 1 (Figure 3), MS is improved by isotope substitution with  $I=1$ . This  
420 is likely due to the hyperfine coupling environment. From the results in Figure 3 it appears  
421 that nuclei with  $I=1$  perform better at smaller coupling constants. Isotopic substitution in  
422 hydrogen gives smaller coupling constants. However, further investigation would have to be  
423 done before definite conclusions are drawn. The case for nitrogen and its isotopes is less  
424 clear. Over the relevant geomagnetic window (25-65  $\mu$ T), both  $I=1/2$  and  $I=1$  are more  
425 favourable at certain values of the magnetic field. For the specific nitrogen N10, the isotopic  
426 substitution with  $I=1/2$  dramatically improves the MS at certain values of the field. While it is  
427 difficult to draw any absolute conclusions, it is potentially interesting that for both hydrogen  
428 and (at least partly) nitrogen, isotopic substitution acts to increase the MS. Although we have  
429 investigated here only isotopes of H and N, differences in the potential to contribute to the  
430 performance of cryptochrome as a magnetic compass are likely to exist also between  
431 isotopes of the other constituent elements of the molecule (i.e., C and O), as well as any  
432 element functioning in other biochemical processes (e.g., S and P). The fact that heavy  
433 isotopes are less abundant in nature than their lighter counterparts (in the case of  $\delta^2H$  and  
434  $\delta^{15}N$  this being only 0.0115% and 0.364%, respectively, see Table 1) does not preclude the

435 possibility that differences in the isotopic composition of a biomolecule such as  
436 cryptochrome between species of animals generate differences in the performance of the  
437 involved biochemical process, despite the negligible effect of heavy isotopes on the speed  
438 of chemical reactions that is predicted by conventional chemical kinetics. The Isotopic  
439 Resonance Hypothesis, on the other hand, posits that optimal, 'resonance' abundances of  
440 stable isotopes reduce the complexity of biochemical systems, affecting the kinetics of direct  
441 and reversed reactions within the system and maximizing the efficiency of biochemical  
442 reactions [13,14,63]. The Isotopic Resonance Hypothesis has received empirical support  
443 from enzymatic reactions, also mediated by a quantum process such as quantum tunnelling  
444 [64,65]. Thus, the enzymatic catalytic action of luciferase on its substrate luciferin with a  
445 deuterium concentration in the local environment 2-4 times higher than the normal  
446 concentration of 150 ppm but still considerably low (250-350 ppm) exhibits a significant  
447 change that is not predicted by conventional chemical kinetics. This indicates that small  
448 concentrations of heavy isotopes exert disproportionately strong effects on the kinetics of  
449 enzymatic processes [66]. Similarly, animals with a cryptochrome composition enriched in  
450 isotopes of, for example, hydrogen and nitrogen may have a superior magnetic sensitivity,  
451 this not being hindered when such isotopes are heavy, such as deuterium ( $^2\text{H}$ ).

452         Consequently, our results show that the isotopic composition of cryptochrome can  
453 exert significant effects on the performance of RPs, hence influencing the likelihood of  
454 developing an ability for magnetoreception and, thus, for migration. This means that the  
455 evolution of migration may be favoured only under certain isotopic compositions of  
456 cryptochrome. This has never been proposed before. But, indeed, non-adaptive origins of  
457 adaptive traits are relevant sources of evolutionary innovations, particularly for metabolic  
458 traits [67].

459         Physiology is considered to have a foundational role in migration, which has been  
460 studied in detail (e.g., [68]). The evolutionary maintenance of migration is based on its

461 adaptive benefits, as it allows animals to get trophic resources that would otherwise be  
462 inaccessible, and is also well understood. However, it is unknown whether differences in  
463 migration among species are due to genetic or environmental effects [69,70]. Recently, a  
464 study on a single migratory bird species (the peregrine falcon *Falco peregrinus*) has  
465 revealed that divergence in the gene *ADCY8* explains differences in migration distance  
466 between populations, but not why these birds always migrate in some extent [71]. As a  
467 consequence, the ultimate factors that generally drive animal migration and that explain the  
468 evolutionary appearance of this behaviour in some species and not in others remain  
469 undeciphered [72]. Interspecific differences in the isotopic composition of cryptochrome may  
470 therefore represent a general explanation for the origin of animal migration.

471         An effective test of our hypothesis will require empirical comparisons of cryptochrome  
472 isotopologues between migratory and non-migratory species of birds or other animals.  
473 Some already existing empirical results, however, may support our proposal. In fact, an  
474 investigation on the isotopic composition of hair keratin in three species of coexisting bats  
475 resulted in an isospace ( $\delta^{13}\text{C}$  vs.  $\delta^{15}\text{N}$ ) of a long-distance migratory bat (*Pipistrellus nathusii*)  
476 markedly distinct from the isospaces of non-migratory and mid-distance migratory bats  
477 (*Pipistrellus pipistrellus* and *Nyctalus noctula*) [73]. Considering that the isotopic profile may  
478 be consistent among all molecules of a species of animal (see Introduction), the latter results  
479 may be in accordance with the hypothesis proposed here.

480         A causal association between animal isotopic profiles and their macroscopic  
481 characteristics would represent a non-adaptive and non-organic source of evolutionary  
482 innovations, and a connection between the mineral and the organic world, unveiling  
483 attributes of organisms not carried by their genetic code. The transference of atomic  
484 information across organisms would represent a DNA-independent inheritance that has  
485 never been investigated, but future studies should investigate if this may in fact be the  
486 evolutionary origin of animal migration and other biological processes.

487

488 **Acknowledgements.** We would like to thank Ilya Sinayskiy for his helpful discussions and  
489 comments during this work.

490 **Funding.** F.P. acknowledges support by the South African Research Chair Initiative of the  
491 Department of Science and Technology and the National Research Foundation.

492 **Ethics.** No ethical issues are associated with this study.

493 **Data, accessibility.** This article has no additional data.

494 **Conflict of interest declaration.** We declare we have no competing interests.

495 **Authors' contributions.** I.G. conceptualised the role of isotopes in organic evolution. A.H.,  
496 B.A. and F.P. contributed to physics interpretation and model development. A.H. did the  
497 calculations and spin dynamics simulations. I.G., A.H., B.A. and F.P. wrote and reviewed  
498 the manuscript.

## 499 **References**

- 500 **1.** Simons JP. 2009 Good vibrations: probing biomolecular structure and interactions  
501 through spectroscopy in the gas phase. *Mol. Phys.* **107**, 2435-2458.
- 502 **2.** Yakushevich LV. 2004 *Nonlinear physics of DNA*. Weinheim, Germany: Wiley-VCH.
- 503 **3.** Lima-de-Faria A. 1997 The atomic basis of biological symmetry and periodicity.  
504 *BioSystems* **43**, 115-135.
- 505 **4.** Trixler F. 2013 Quantum tunnelling to the origin and evolution of life. *Curr. Org. Chem.*  
506 **17**, 1758-1770.
- 507 **5.** Galván I, Cerezo J, Jorge A, Wakamatsu K. 2018 Molecular vibration as a novel  
508 explanatory mechanism for the expression of animal colouration. *Integr. Biol.* **10**, 464-  
509 473.
- 510 **6.** Bigeleisen J. 1965 Chemistry of Isotopes: Isotope chemistry has opened new areas of  
511 chemical physics, geochemistry, and molecular biology. *Science* **147**, 463-471.

- 512 **7.** Epov VN, Malinovskiy D, Vanhaecke F, Bégué D, Donard OF. 2011 Modern mass  
513 spectrometry for studying mass-independent fractionation of heavy stable isotopes in  
514 environmental and biological sciences. *J. Anal. At. Spectrom.* **26**, 1142-1156.
- 515 **8.** Fry B. 2006 *Stable Isotope Ecology*. New York, NY: Springer Science+Business Media.
- 516 **9.** Zubarev RA. 2011 Role of stable isotopes in life—Testing isotopic resonance  
517 hypothesis. *Genom. Proteom. Bioinform.* **9**, 15-20.
- 518 **10.** Caut S, Angulo E, Courchamp F. 2008 Caution on isotopic model use for analyses of  
519 consumer diet. *Can. J. Zool.* **86**, 438-445.
- 520 **11.** Xie X, Zubarev RA. 2014 Effects of low-level deuterium enrichment on bacterial  
521 growth. *PLoS ONE* **9**, e102071.
- 522 **12.** Basov A., Fedulova L., Baryshev M., Dzhimak S. 2019 Deuterium-depleted water  
523 influence on the isotope  $^2\text{H}/^1\text{H}$  regulation in body and individual adaptation. *Nutrients*  
524 **11**, 1903.
- 525 **13.** Xie X, Zubarev RA. 2015 Isotopic resonance hypothesis: experimental verification by  
526 *Escherichia coli* growth measurements. *Sci. Rep.* **5**, 9215.
- 527 **14.** Andriukonis E, Gorokhova E. 2017 Kinetic  $^{15}\text{N}$ -isotope effects on algal growth. *Sci. Rep.*  
528 **7**, 44181.
- 529 **15.** DeNiro MJ, Epstein S. 1978 Influence of diet on the distribution of carbon isotopes in  
530 animals. *Geochim. Cosmochim. Acta* **42**, 495-506.
- 531 **16.** DeNiro MJ, Epstein S. 1981 Influence of diet on the distribution of nitrogen isotopes in  
532 animals. *Geochim. Cosmochim. Acta* **45**, 341-351.
- 533 **17.** Olivar MP, Bode A, López-Pérez C, Hulley PA, Hernández-León S. 2019 Trophic  
534 position of lanternfishes (Pisces: Myctophidae) of the tropical and equatorial Atlantic  
535 estimated using stable isotopes. *ICES J. Mar. Sci.* **76**, 649-661.

- 536 **18.** Wißing C, Rougier H, Baumann C, Comeyne A, Crevecoeur I, Drucker DG et al. 2019.  
537 Stable isotopes reveal patterns of diet and mobility in the last Neandertals and first  
538 modern humans in Europe. *Sci. Rep.* **9**, 4433.
- 539 **19.** Manlick PJ, Petersen SM, Moriarty KM, Pauli JN. 2019 Stable isotopes reveal limited  
540 Eltonian niche conservatism across carnivore populations. *Funct. Ecol.* **33**, 335-345.
- 541 **20.** Haak CR, Power M, Cowles GW, Danylchuk AJ. 2019 Hydrodynamic and isotopic niche  
542 differentiation between juveniles of two sympatric cryptic bonefishes, *Albula vulpes* and  
543 *Albula goreensis*. *Environ. Biol. Fishes* **102**, 129-145.
- 544 **21.** Moroz LL, Kocot KM, Citarella MR, Dosung S, Norekian TP, Povolotskaya IS et al. 2014.  
545 The ctenophore genome and the evolutionary origins of neural systems. *Nature* **510**,  
546 109-114.
- 547 **22.** Deng M, Zhang X, Luo J, Liu H, Wen W, Luo H et al. 2020 Metabolomics analysis  
548 reveals differences in evolution between maize and rice. *Plant J.* **103**, 1710-1722.
- 549 **23.** Brookes JC 2017. Quantum effects in biology: golden rule in enzymes, olfaction,  
550 photosynthesis and magnetodetection. *Proc. R. Soc. A* **473**, 20160822.
- 551 **24.** Marais A, Adams B, Ringsmuth AK, Ferretti M, Gruber JM, Hendrikx R et al. 2018. The  
552 future of quantum biology. *J. R. Soc. Interface* **15**, 20180640.
- 553 **25.** Buchachenko AL. 2001 Magnetic isotope effect: Nuclear spin control of chemical  
554 reactions. *J. Phys. Chem. A* **105**, 9995-10011.
- 555 **26.** Wiltschko W, Wiltschko R. 2005 Magnetic orientation and magnetoreception in birds  
556 and other animals. *J. Comp. Physiol. A* **191**, 675-693.
- 557 **27.** Dreyer D, Frost B, Mouritsen H, Günther A, Green K, Whitehouse M et al. 2018. The  
558 Earth's magnetic field and visual landmarks steer migratory flight behavior in the  
559 nocturnal Australian Bogong moth. *Curr. Biol.* **28**, 2160-2166.
- 560 **28.** Ritz T, Thalau P, Phillips JB, Wiltschko R, Wiltschko W. 2004 Resonance effects  
561 indicate a radical-pair mechanism for avian magnetic compass. *Nature* **429**, 177-180.

- 562 **29.** Günther A, Einwich A, Sjulstok E, Feederle R, Bolte P, Koch KW. et al. 2018 Double-  
563 cone localization and seasonal expression pattern suggest a role in magnetoreception  
564 for European robin cryptochrome 4. *Curr. Biol.* **28**, 211-223.
- 565 **30.** Xu J, Jarocha LE, Zollitsch T et al. 2021. Magnetic sensitivity of cryptochrome 4 from a  
566 migratory songbird. *Nature* **594**, 535–540.
- 567 **31.** Wiltschko R, Nießner C, Wiltschko W. 2021 The magnetic compass of birds: the role of  
568 cryptochrome. *Front. Physiol.* **12**, 667000.
- 569 **32.** Bazalova O, Kvicalova M, Valkova T, Slaby P, Bartos P, Netusil R et al. 2016.  
570 Cryptochrome 2 mediates directional magnetoreception in cockroaches. *Proc. Natl.*  
571 *Acad. Sci. USA* **113**, 1660-1665.
- 572 **33.** Foley LE, Gegear RJ, Reppert SM. 2011 Human cryptochrome exhibits light-dependent  
573 magnetosensitivity. *Nat. Commun.* **2**, 356.
- 574 **34.** Caspar KR, Moldenhauer K, Moritz RE, Němec P, Malkemper EP, Begall S. 2020 Eyes  
575 are essential for magnetoreception in a mammal. *J. R. Soc. Interface* **17**, 20200513.
- 576 **35.** Hogben HJ, Biskup T, Hore PJ. 2012 Entanglement and sources of magnetic anisotropy  
577 in radical-pair based avian magnetoreceptors. *Phys. Rev. Lett.* **109**, 220501.
- 578 **36.** Fay TP, Lindoy LP, Manolopoulos DE, Hore PJ. 2020 How quantum is radical pair  
579 magnetoreception? *Faraday Discuss.* **221**, 77-91.
- 580 **37.** Zhang Y, Berman GP, Kais S. 2015 The radical pair mechanism and the avian chemical  
581 compass: Quantum coherence and entanglement. *Int. J. Quantum Chem.* **115**, 1327-  
582 1341.
- 583 **38.** Hochstoeger T, Al Said T, Maestre D, Walter F, Vilceanu A, Pedron M. et al. 2020 The  
584 biophysical, molecular, and anatomical landscape of pigeon CRY4: A candidate light-  
585 based quantal magnetosensor. *Sci. Adv.* **6**, eabb9110.
- 586 **39.** Player TC, Hore PJ. 2019 Viability of superoxide-containing radical pairs as  
587 magnetoreceptors. *J. Chem. Phys.* **151**, 225101.

- 588 **40.** Tiersch M, Briegel HJ. 2012 Decoherence in the chemical compass: The role of  
589 decoherence for avian magnetoreception. *Phil. Trans. R. Soc. A* **370**, 4517-4540.
- 590 **41.** Kattinig D. 2017 Radical-pair-based magnetoreception amplified by radical scavenging:  
591 resilience to spin relaxation. *J. Phys. Chem. B* **121**, 10215-10227.
- 592 **42.** Hiscock HG, Worster S, Kattinig DR, Steers C, Jin Y, Manolopoulos DE, Mouritsen H,  
593 Hore PJ. 2016 The quantum needle of the avian magnetic compass. *Proc. Natl. Acad.*  
594 *Sci. USA* **113**, 4634-4639.
- 595 **43.** Jain R, Poonia VS, Saha K, Saha D, Ganguly S. 2021 The avian compass can be  
596 sensitive even without sustained electron spin coherence. *Proc. R. Soc. A* **477**,  
597 20200778.
- 598 **44.** Tiersch M, Steiner UE, Popescu S, Briegel HJ. 2012 Open quantum system approach  
599 to the modeling of spin recombination reactions. *J. Phys. Chem. A* **116**, 4020-4028.
- 600 **45.** Ritz T, Wiltschko R, Hore PJ, Rodgers CT, Stapput K, Thalau P et al. 2009 Magnetic  
601 compass of birds is based on a molecule with optimal directional sensitivity. *Biophys.*  
602 *J.* **96**, 3451-3457.
- 603 **46.** Haberkorn R. 1976 Density matrix description of spin-selective radical pair reactions.  
604 *Mol. Phys.* **32**, 1491–1493.
- 605 **47.** Jones JA, Hore PJ. 2010 Spin-selective reactions of radical pairs act as quantum  
606 measurements. *Chem. Phys. Lett.* **488**, 90–93.
- 607 **48.** Kominis IK. 2009 Quantum Zeno effect explains magnetic-sensitive radical-ion-pair  
608 reactions. *Phys. Rev. E* **80**, 056115.
- 609 **49.** Adams B, Sinayskiy I, Petruccione F. 2018 An open quantum system approach to the  
610 radical pair mechanism. *Sci. Rep.* **8**, 15719.
- 611 **50.** Gauger EM, Rieper E, Morton JJJ, Benjamin SC, Vedral V. 2011 Sustained quantum  
612 coherence and entanglement in the avian compass. *Phys. Rev. Lett.* **106**, 040503.



- 613 **51.** Breuer HP, Petruccione F. 2002 *The theory of open quantum systems*. Oxford, UK:  
614 Oxford University Press.
- 615 **52.** Cai J, Caruso F, Plenio MB. 2012 Quantum limits for the magnetic sensitivity of a  
616 chemical compass. *Phys. Rev. A* **85**, 040304.
- 617 **53.** Johansson JR, Nation PD, Nori F. 2012 QuTiP: An open-source Python framework for  
618 the dynamics of open quantum systems. *Comput. Phys. Commun.* **183**, 1760–1772.
- 619 **54.** Atkins PW, Friedman RS. 2010 *Molecular Quantum Mechanics. 5th Edition*. Oxford, UK:  
620 Oxford University Press.
- 621 **55.** Lee AA, Lau JCS, Hogben HJ, Biskup T, Kattnig DR, Hore PJ. 2014 Alternative radical  
622 pairs for cryptochrome-based magnetoreception. *J. R. Soc. Interface* **11**, 20131063.
- 623 **56.** Gerson F, Huber W. 2003 *Electron Spin Resonance Spectroscopy of Organic Radicals*.  
624 Weinheim, Germany: Wiley-VCH.
- 625 **57.** Bandyopadhyay JN, Paterek T, Kaszlikowski D. 2012 Quantum coherence and  
626 sensitivity of avian magnetoreception. *Phys. Rev. Lett.* **109**, 110502.
- 627 **58.** Sies H, Belousov VV, Chandel NS, Davies MJ, Jones DP, Mann GE et al. 2022 Defining  
628 roles of specific reactive oxygen species (ROS) in cell biology and physiology. *Nat. Rev.*  
629 *Mol. Cell Biol.* **23**, 499-515.
- 630 **59.** Usselman RJ, Hill I, Singel DJ, Martino CF. 2014 Spin biochemistry modulates reactive  
631 oxygen species (ROS) production by radio frequency magnetic fields. *PLoS ONE* **9**,  
632 e93065.
- 633 **60.** Usselman RJ, Chavarriaga C, Castello PR, Procopio M, Ritz T, Dratz EA et al. 2016  
634 The quantum biology of reactive oxygen species partitioning impacts cellular  
635 bioenergetics. *Sci. Rep.* **6**, 38543.
- 636 **61.** Galván I, Erritzøe J, Karadaş F, Møller AP. 2012 High levels of liver antioxidants are  
637 associated with life-history strategies characteristic of slow growth and high survival  
638 rates in birds. *J. Comp. Physiol. B* **182**, 947-959.

- 639 **62.** Zadeh-Haghighi H, Simon C. 2022 Magnetic field effects in biology from the perspective  
640 of the radical pair mechanism. *J. R. Soc. Interface* **19**, 20220325.
- 641 **63.** Gorokhova E. 2017 Shifts in rotifer life history in response to stable isotope enrichment:  
642 testing theories of isotope effects on organismal growth. *R. Soc. Open Sci.* **4**, 160810.
- 643 **64.** Klinman JP, Kohen A. 2013 Hydrogen tunneling links protein dynamics to enzyme  
644 catalysis. *Ann. Rev. Biochem.* **82**, 471.
- 645 **65.** Pudney CR, Lane RS, Fielding AJ, Magennis SW, Hay S, Scrutton NS. 2013 Enzymatic  
646 single-molecule kinetic isotope effects. *J. Am. Chem. Soc.* **135**, 3855-3864.
- 647 **66.** Rodin S, Rebellato P, Lundin A, Zubarev RA. 2018 Isotopic resonance at 370 ppm  
648 deuterium negatively affects kinetics of luciferin oxidation by luciferase. *Sci. Rep.* **8**,  
649 16249.
- 650 **67.** Barve A, Wagner A. 2013 A latent capacity for evolutionary innovation through  
651 exaptation in metabolic systems. *Nature* **500**, 203-206.
- 652 **68.** Lennox RJ, Chapman JM, Souliere CM, Tudorache C, Wikelski M, Metcalfe JD, Cooke  
653 SJ. 2016 Conservation physiology of animal migration. *Cons. Physiol.* **4**, cov072.
- 654 **69.** Cresswell KA, Satterthwaite WH, Sword GA. 2011 Understanding the evolution of  
655 migration through empirical examples. In: *Animal Migration: A Synthesis* (Eds. Milner-  
656 Gulland EJ, Fryxell JM, Sinclair ARE), pp. 7-16. Oxford, UK: Oxford University Press.
- 657 **70.** Dingle H. 2014 *Migration: the Biology of Life on the Move*. Oxford, UK: Oxford University  
658 Press.
- 659 **71.** Gu Z, Pan S, Lin Z, Hu L, Dai X, Chang J et al. 2021 Climate-driven flyway changes and  
660 memory-based long-distance migration. *Nature* **591**, 259-264.
- 661 **72.** Shaw AK, Couzin ID. 2013 Migration or residency? The evolution of movement behavior  
662 and information usage in seasonal environments. *Am. Nat.* **181**, 114-124.
- 663 **73.** Voigt CC, Lindecke O, Schönborn S, Kramer-Schadt S, Lehmann D. 2016 Habitat use  
664 of migratory bats killed during autumn at wind turbines. *Ecol. Appl.* **26**, 771-783.

665 **Table 1. Nuclear isotope effect of nitrogen and hydrogen.**

| # | Name     | Symbol | Z | N | A  | Spin I parity | ( $\mu$ in $\mu_N$ ) | Nuclear g factor ( $g_n$ ) | Natural abundance | Isotopic mass ( $u$ ) |
|---|----------|--------|---|---|----|---------------|----------------------|----------------------------|-------------------|-----------------------|
| 1 | Hydrogen | H      | 1 | 0 | 1  | 1/2 +         | +2.7928              | +5.5857                    | 99.9885 %         | 1.0078                |
| 2 | Hydrogen | H (D)  | 1 | 1 | 2  | 1 +           | 0.8574               | +0.8574                    | 0.0115 %          | 2.0141                |
| 3 | Nitrogen | N      | 7 | 7 | 14 | 1 +           | 0.4037               | +0.4038                    | 99.636 %          | 14.0030               |
| 4 | Nitrogen | N      | 7 | 8 | 15 | 1/2 -         | -0.2832              | -0.5663                    | 0.364 %           | 15.0001               |

666  $\mu$  in  $\mu_N$  : Nuclear magnetic moment of spin I in  $h/2\pi$ .

667

668

669

670

671

672

673

674

675

676

677

678

679

680

681

682

683

684

685 **Table 2. Hyperfine coupling tensors for the [FAD<sup>•-</sup> – TrpH<sup>+</sup>] radical system, taken**  
686 **from Hiscock et al. (2016). Following Jain et al. (2021), all hyperfine tensors are**  
687 **simultaneously diagonalized.**

| Nuclei                                              | a <sub>x</sub> (μT) | a <sub>y</sub> (μT) | a <sub>z</sub> (μT) |
|-----------------------------------------------------|---------------------|---------------------|---------------------|
| N10 in FAD <sup>•-</sup> radical ( <sup>14</sup> N) | - 24.1              | - 14.4              | 604.6               |
| N10 in FAD <sup>•-</sup> radical ( <sup>15</sup> N) | 33.8                | 20.2                | - 848.1             |
| H6 in FAD <sup>•-</sup> radical ( <sup>1</sup> H)   | - 530.4             | - 433.6             | - 197.6             |
| H6 in FAD <sup>•-</sup> radical ( <sup>2</sup> H)   | - 81.4              | - 66.6              | - 30.3              |
| <hr/>                                               |                     |                     |                     |
| N1 in TrpH <sup>+</sup> radical ( <sup>14</sup> N)  | - 63.6              | - 53                | 1081.2              |
| N1 in TrpH <sup>+</sup> radical ( <sup>15</sup> N)  | 89.2                | 74.3                | - 1516.3            |
| H1 in TrpH <sup>+</sup> radical ( <sup>1</sup> H)   | 1082.6              | - 705.4             | - 6.9               |
| H1 in TrpH <sup>+</sup> radical ( <sup>2</sup> H)   | 166.2               | - 108.3             | - 1.06              |

688

689

690

691

692

693

694

695

696

697

698

699

700

701 **Legends to figures:**

702

703 **Figure 1. The radical pair (RP) mechanism in cryptochrome may facilitate**  
704 **magnetoreception in migratory animals.** Within the protein cryptochrome 4, a flavin  
705 residue and a tryptophan form a dyad that, upon photoexcitation, gives rise to a flavin radical  
706 ( $FH^{\bullet}$ , or  $FAD^{\bullet-}$ ) and a tryptophan radical ( $W^{\bullet}$ , or  $TrpH^{\bullet+}$ ). Then the RP can either produce  
707 photoproducts, or recombine to produce the original, zero-spin dyad molecule. The radical  
708 pair is initially in singlet state, but hyperfine coupling leads to conversion into non-reactive  
709 triplet states. The recombination reaction thus requires a triplet-singlet spin conversion,  
710 which is a function of the magnetic field, the nuclear spin and its projection, the nuclear  
711 magnetic moment, the hyperfine coupling constant, the frequency and amplitude of the  
712 magnetic field, and the interaction between unpaired electrons [27]. As the nuclear spin  
713 differs between isotopes, isotopes with specific  $I$  values experience specific hyperfine  
714 coupling between the unpaired electron and the magnetic nucleus, potentially leading to fast  
715 triplet-singlet conversion. This conversion is slower in isotopes with other  $I$  value. In the  
716 flavin-tryptophan radical pair, the triplet-singlet conversion rate depends on the orientation  
717 of the Earth's magnetic field, allowing orientation and migratory movements. Molecular and  
718 Earth images taken from Dreyer et al. [27] (open access content). Swift image belongs to  
719 Stuart Price (<https://flic.kr/p/TLn66s>) and is under CC BY-SA 2.0 license  
720 (<https://creativecommons.org/licenses/by-sa/2.0/>).

721

722 **Figure 2. Hyperfine patterns occurring during the replacement of a proton (H) by a**  
723 **deuterium (D) and a  $^{14}\text{N}$  nucleus (N) by its  $^{15}\text{N}$  isotope.** Following Gerson and Huber [56].

724

725 **Figure 3. Modelling results for the magnetic sensitivity of cryptochrome ( $\Delta\Phi_s$ ) for**  
726 **different spin numbers along a range of anisotropic hyperfine coupling strengths (a).**

727 a) Here, the only difference between the treatment of nuclei in the RP model lies in their spin  
728 quantum numbers, meaning that we investigate MS with respect to the hyperfine coupling  
729 of a single nucleus model for two different spin quantum numbers ( $I=1$  and  $I=1/2$ ). In this  
730 simple case, we do not include noise in the model. The results demonstrate clear differences  
731 between the two spin numbers, with  $I=1/2$  giving the greatest magnetic sensitivity for the  
732 greatest range of hyperfine coupling constants and the maximum sensitivity for also  $I=1/2$  is  
733 considerably greater than  $I=1$ . b) For hyperfine up to 1.5 mT, the sensitivity reaches a  
734 plateau, which is equal to 0.16 for  $I=1$  and 0.25 for  $I=1/2$ .

735

736 **Figure 4. Modelling results for the magnetic sensitivity of cryptochrome ( $\Delta\Phi_s$ ) for**  
737 **different spin numbers along a range of anisotropic hyperfine coupling strength (a).**

738 a) With noise incorporated into the model, it is shown that MS can be improved for certain  
739 hyperfine coupling strengths. For a nucleus with  $I=1/2$ , the maximum MS increases from  
740 0.388 (corresponding to a hyperfine coupling strength of 17.4  $\mu\text{T}$ ) to 0.411 (corresponding  
741 to a hyperfine coupling strength of 20.9  $\mu\text{T}$ ). For a nucleus with  $I=1$ , the maximum MS  
742 increases from 0.259 (corresponding to a hyperfine coupling strength of 8.7  $\mu\text{T}$ ) to 0.274  
743 (corresponding to a hyperfine coupling strength of 10.6  $\mu\text{T}$ ). b) It is clear from the results  
744 that the sensitivity of the avian compass relies on the recombination rate. A good sensitivity  
745 requires a recombination rate that gives enough time for magnetic field effects to occur.  
746 Here it is shown that sensitivity decreases when increasing the recombination rate, i.e.  
747 shorter lifetime for the radical pair.

748

749 **Figure 5. Isotope substitution effects on the magnetic effect (singlet yield,  $\Phi_s$ ) with**  
750 **different inclinations of cryptochrome for a one-nucleus model.** The results are  
751 separately shown for the radicals of the RP system in cryptochrome (left panels:  $\text{FAD}^{\bullet-}$ , right  
752 panels:  $\text{TrpH}^{\bullet+}$ ) and for different hydrogen (a: H6, c: H1) and nitrogen (b: N10, d: N1) nuclei

753 and their isotopes. It is clear that isotopes with integer spin have consistently higher singlet  
754 yield than half integer, even with different coupling constants. Singlet yield is an interesting  
755 feature to consider with respect to RPs in the biological context. In addition to  
756 magnetoreception, singlet yield has been used to investigate a number of other biological  
757 functions which may depend on radical reactions [62]. In reactions involving reactive oxygen  
758 species, singlet yield might be used as an indication of oxidative stress. The strong isotope  
759 dependence of singlet yield demonstrated in our results is potentially interesting with respect  
760 to observations made that isotopic changes in diet lead to oxidative stress [9].

761

762 **Figure 6. Isotope substitution effects on the magnetic effect (singlet yield,  $\Phi_s$ ) with**  
763 **different inclinations of cryptochrome for two-nuclei model.** The results for the four  
764 different combinations of hydrogen and nitrogen isotopes for the two-nuclei model are  
765 shown. Results are relatively similar to those of the single-nucleus model (Figure 5), with a  
766 minimum at about 90° singlet yield. Singlet yield is greatest for the case in which both nuclei  
767 have integer spin, that is for N14 and deuterium.

768

769

770 **Figure 7. Isotope substitution effects for the magnetic sensitivity of cryptochrome**  
771 **( $\Delta\Phi_s$ ) along a range of strength values of an external magnetic field ( $B$ ).** Examples of  
772 different nuclei in the radicals of the RP system in cryptochrome are shown (from top to down  
773 panels: H6 in FAD<sup>•-</sup>, N1 in TrpH<sup>•+</sup>, H1 in TrpH<sup>•+</sup>, N10 in FAD<sup>•-</sup>). **Scenario 1** (see Figure 3)  
774 showed a clear difference between how spin number changes MS, with  $I=1/2$  conferring  
775 greater MS than  $I=1$ . However, the effect of the spin number is also dependent on the  
776 hyperfine coupling strength, with  $I=1/2$  performing best at larger coupling constants than  $I=1$ .  
777 In **Scenario 2** it is more difficult to conclude that there is a favourable spin number with  
778 respect to MS. This is likely due to the influence of the specific hyperfine coupling constants.

779 While the hyperfine coupling strength decreases with isotope substitution in hydrogen, it  
780 increases with isotope substitution in nitrogen. If we consider only the magnetic field strength  
781 relevant to migration, which is the geomagnetic field (25-65  $\mu\text{T}$ ), then for the case of both  
782 hydrogens,  $I=1$  gives greater magnetic sensitivity than  $I=1/2$ . The case is less clear for  
783 nitrogen where both  $I=1/2$  and  $I=1$  show greater MS for specific magnetic field strengths  
784 over the geomagnetic window (25-65  $\mu\text{T}$ ). This could be due to the fact that although the  
785 coupling strengths for the nitrogen isotopes are further from the ideal values, the isotopic  
786 substitution from  $I=1$  to  $I=1/2$  confers some advantage.



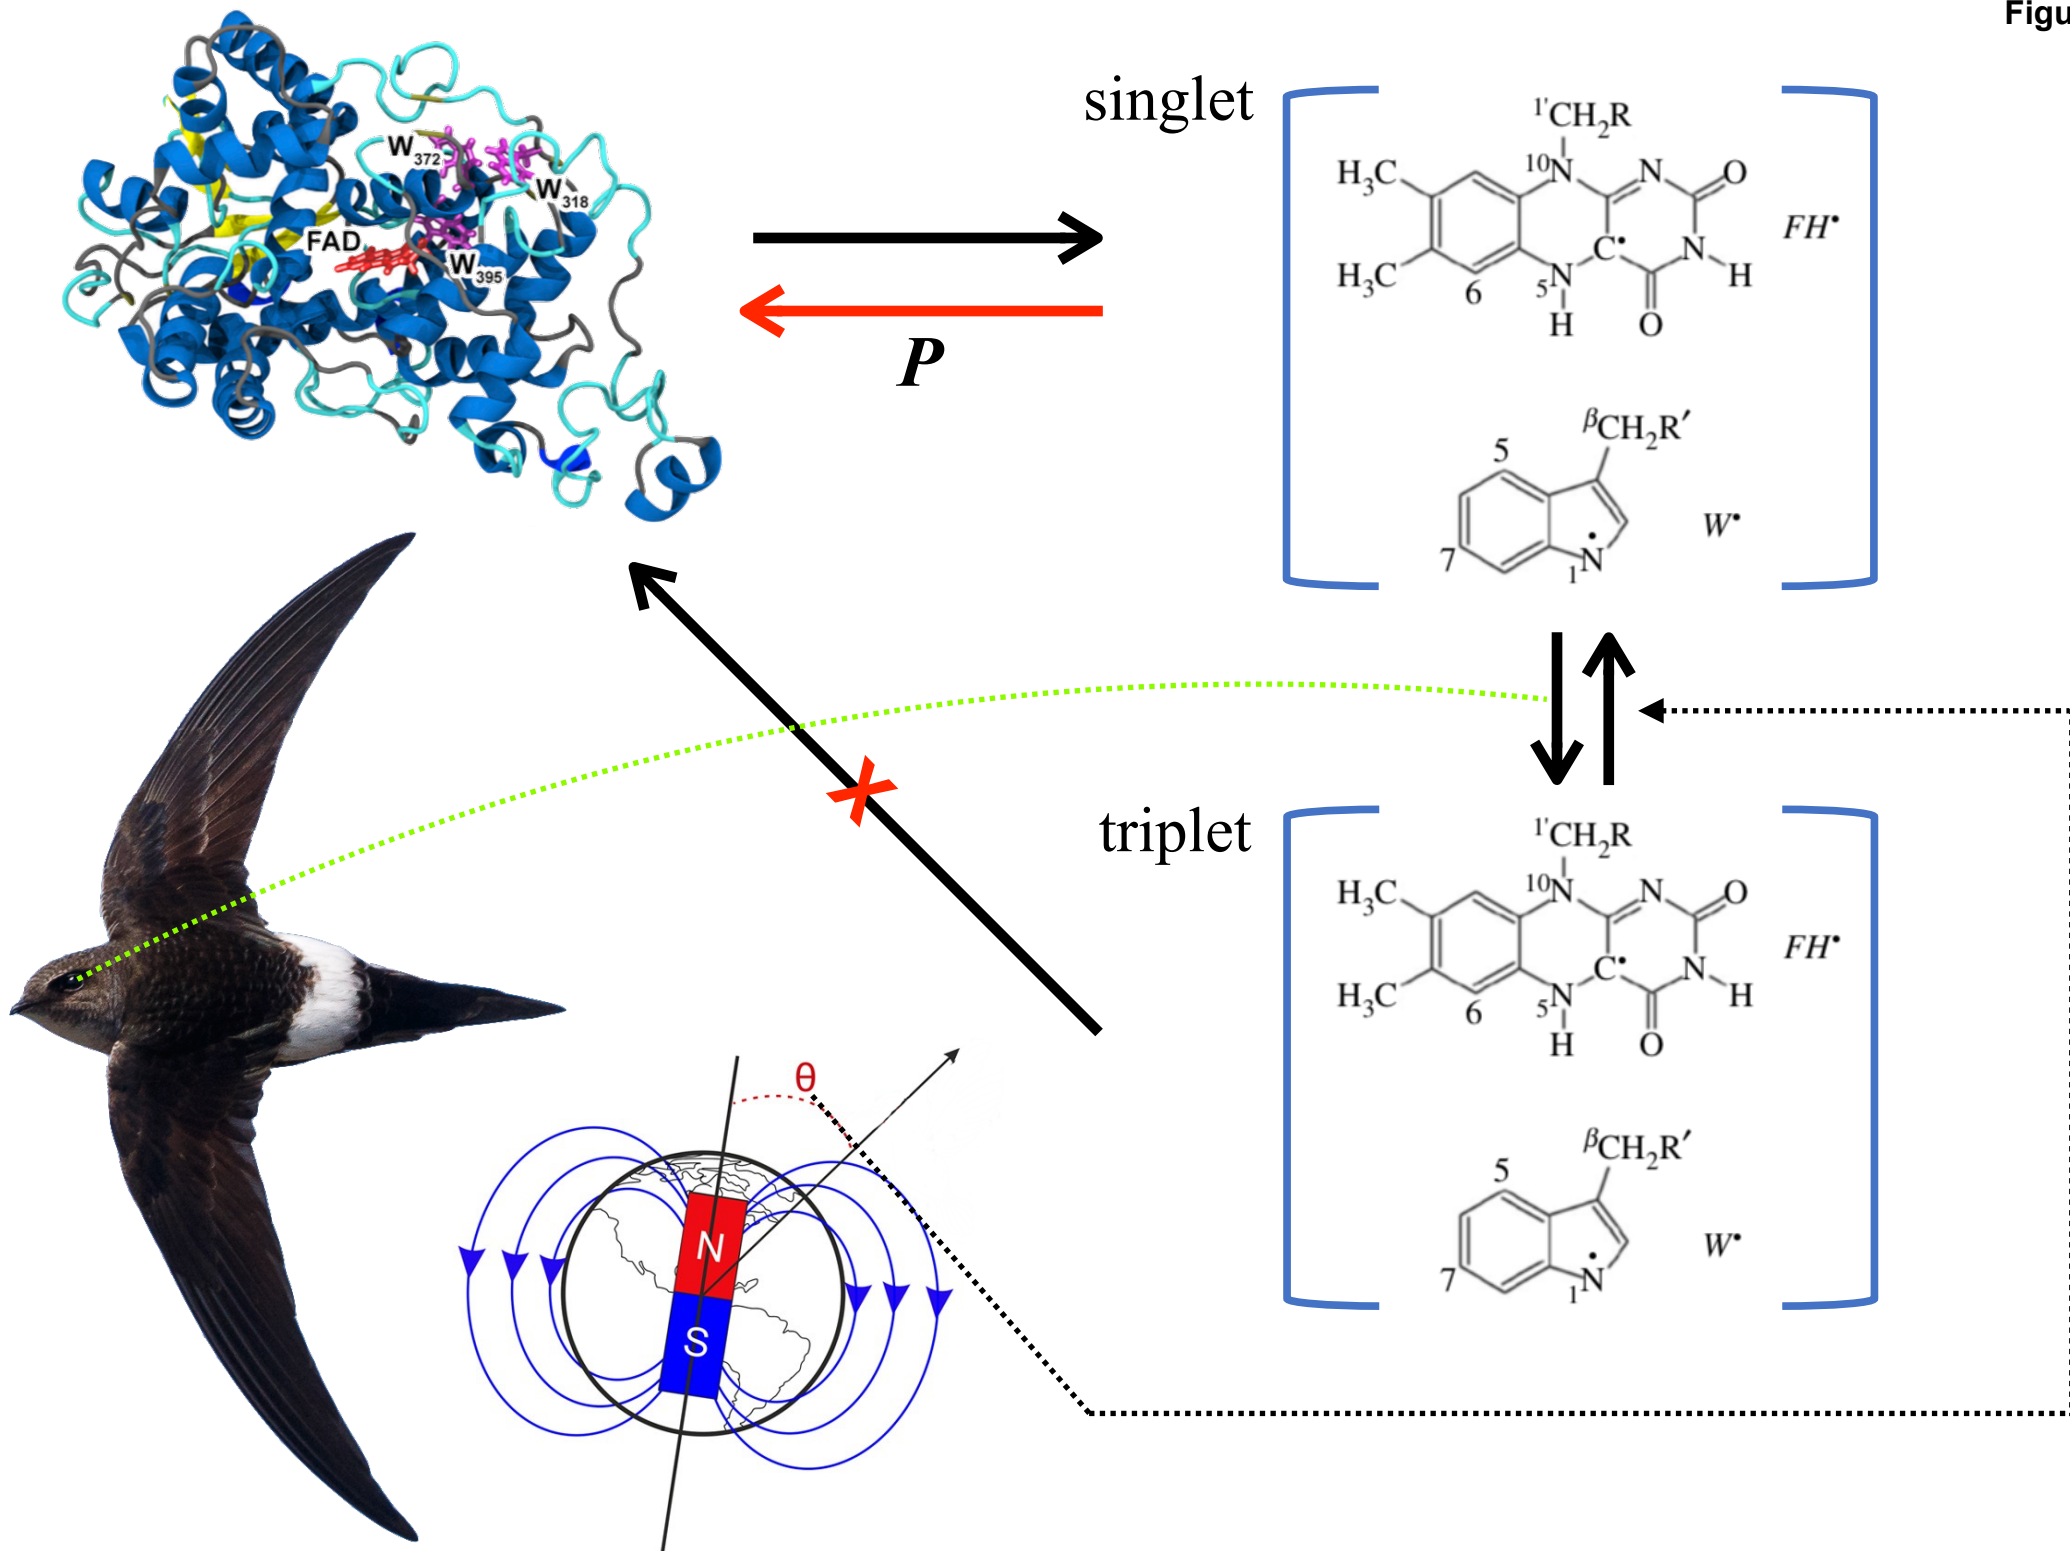

**Figure 2**

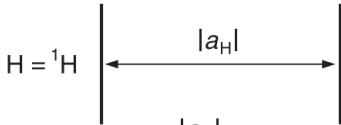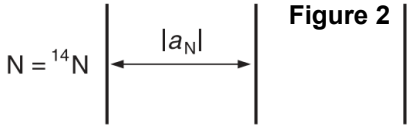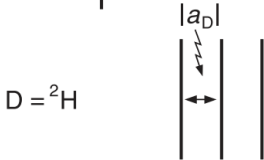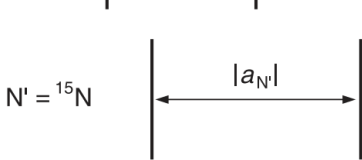

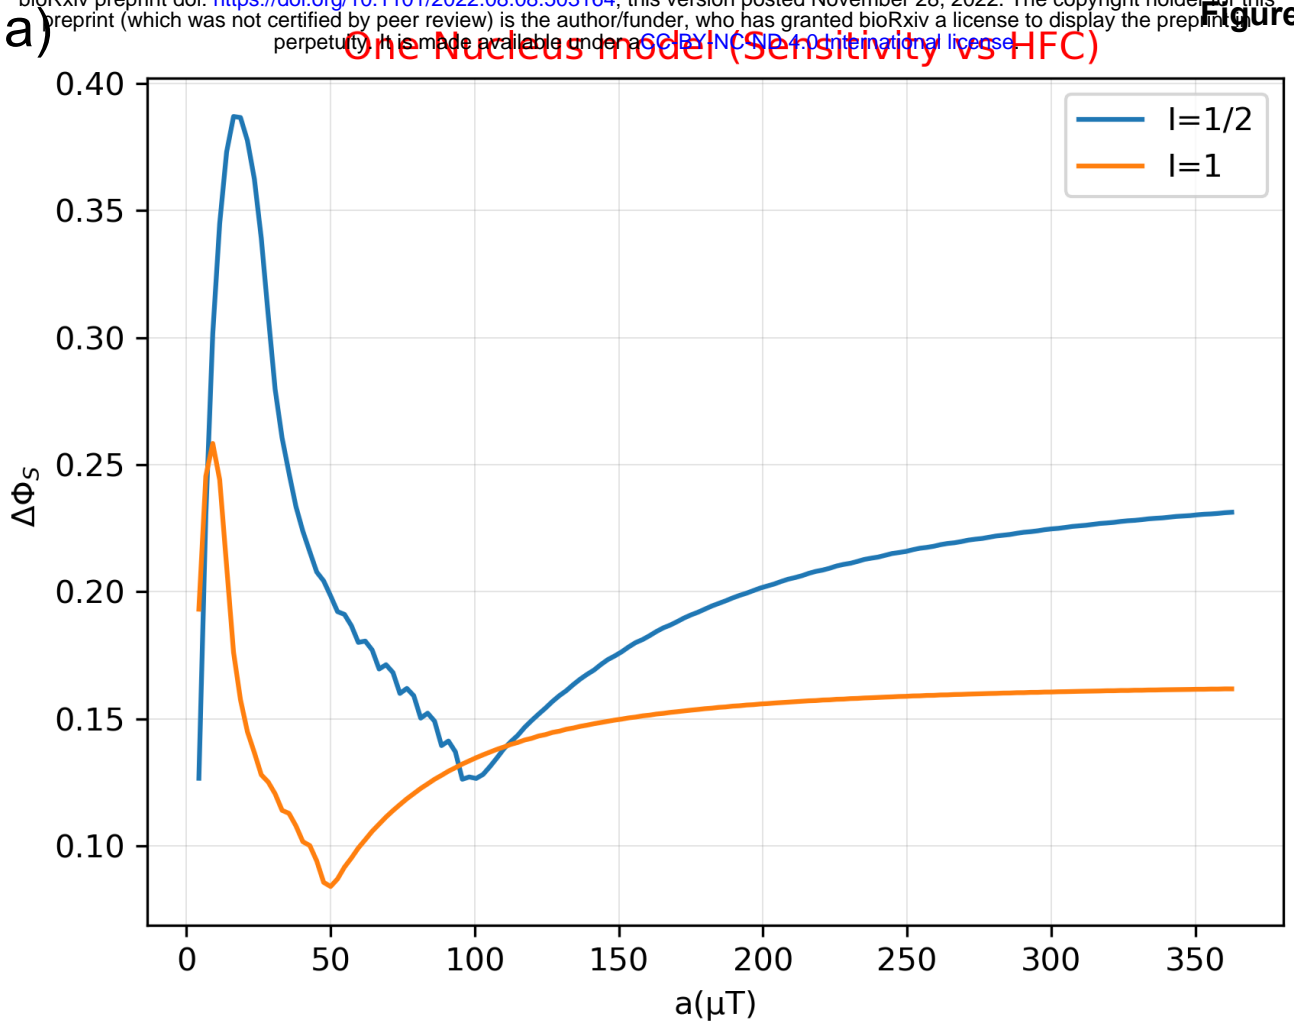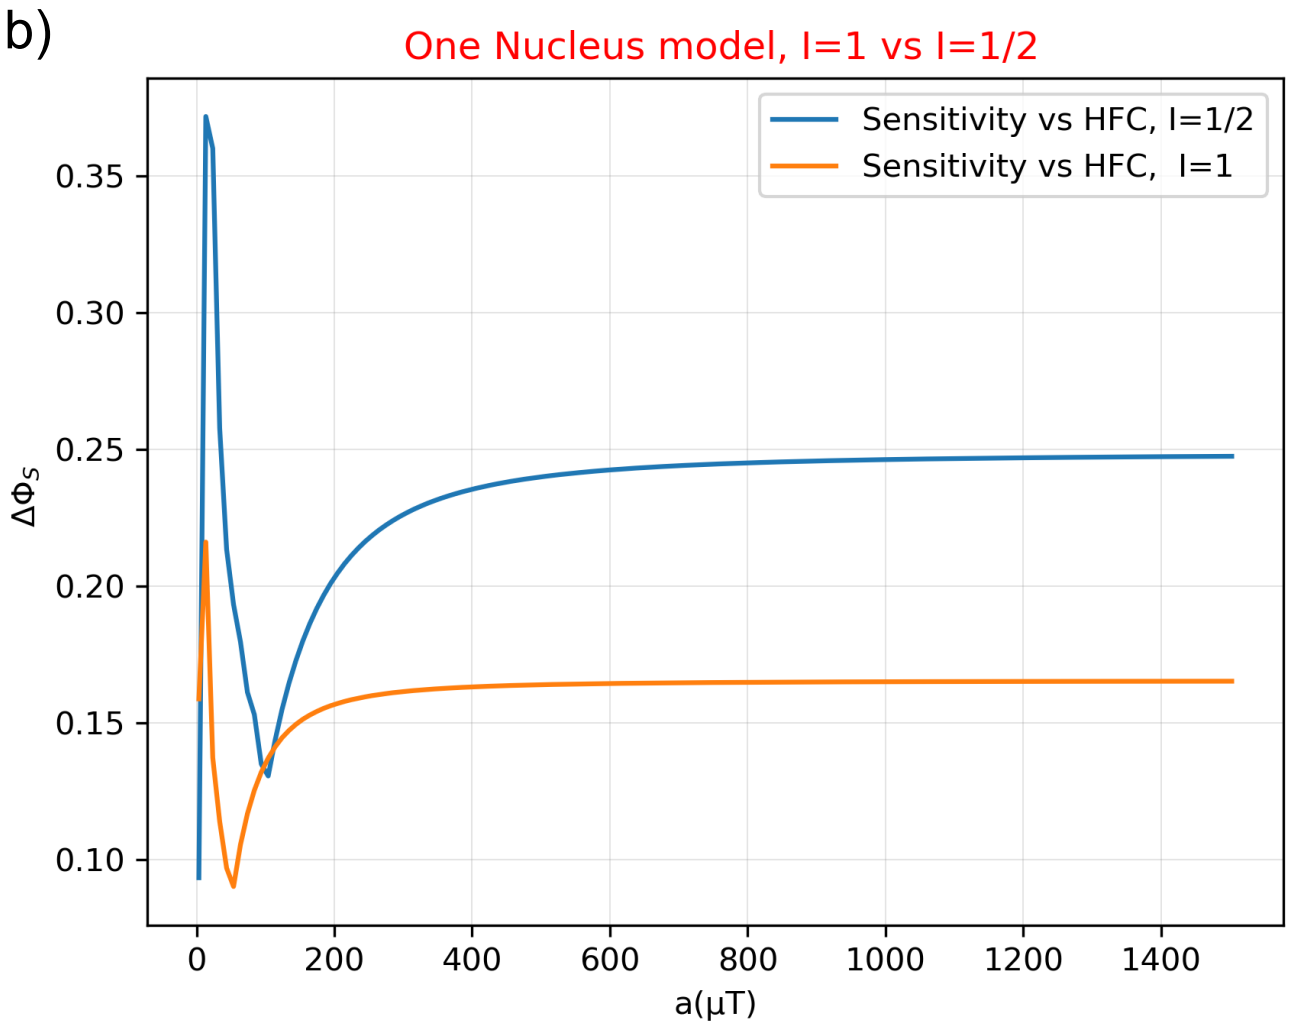

One Nucleus with  $I = 1/2$ 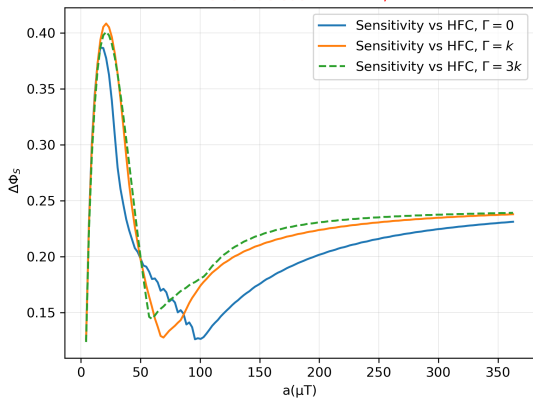

a)

One Nucleus with  $I = 1$ 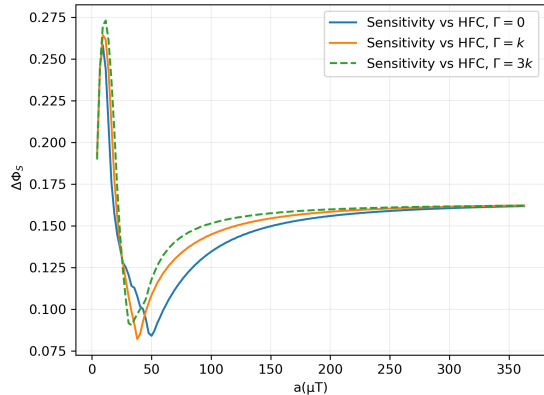One Nucleus with  $I = \frac{1}{2}$ 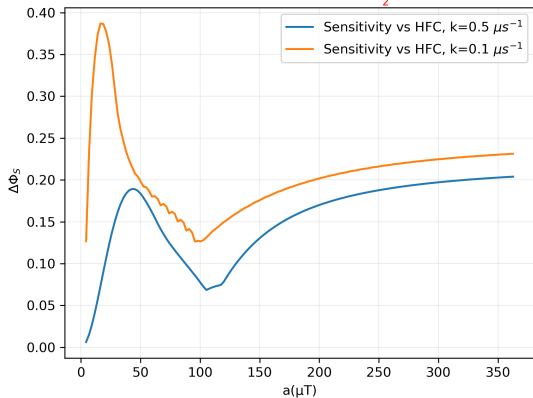

b)

One Nucleus model,  $I = 1$ 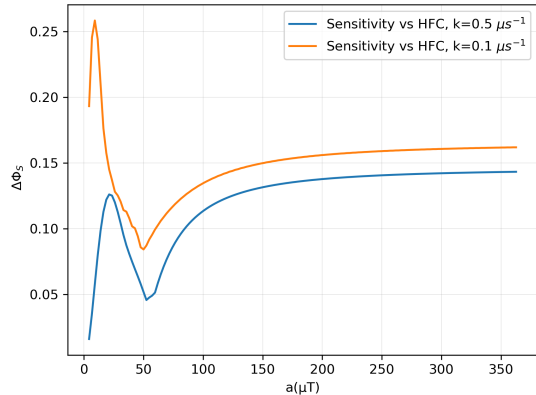

**Figure 5**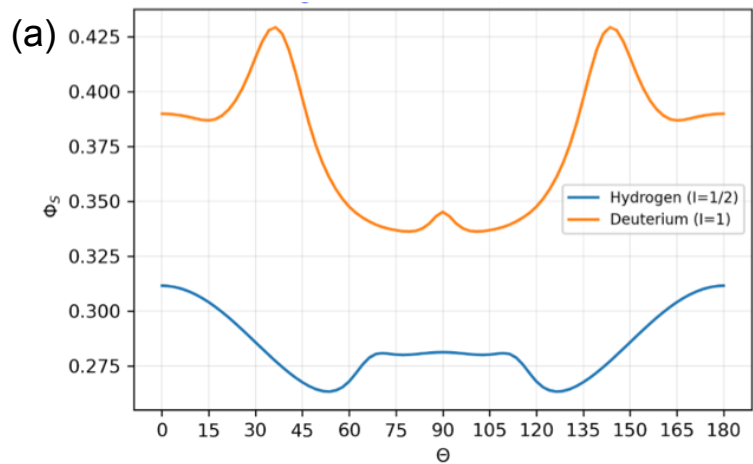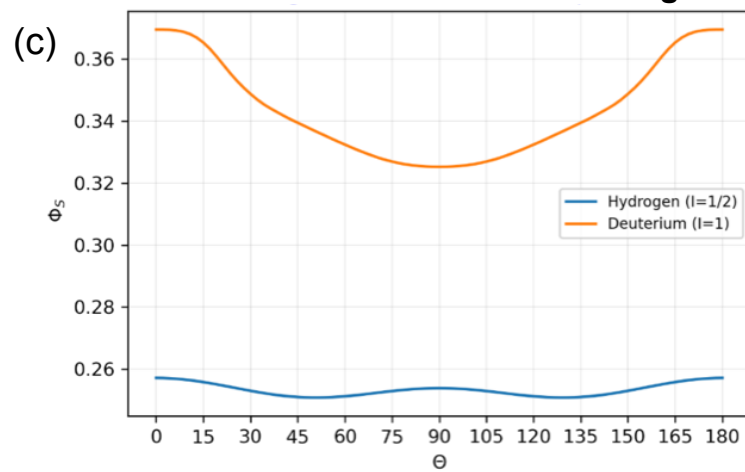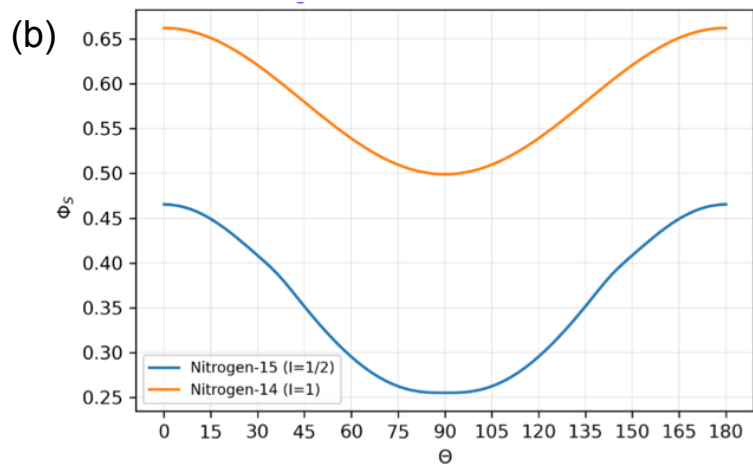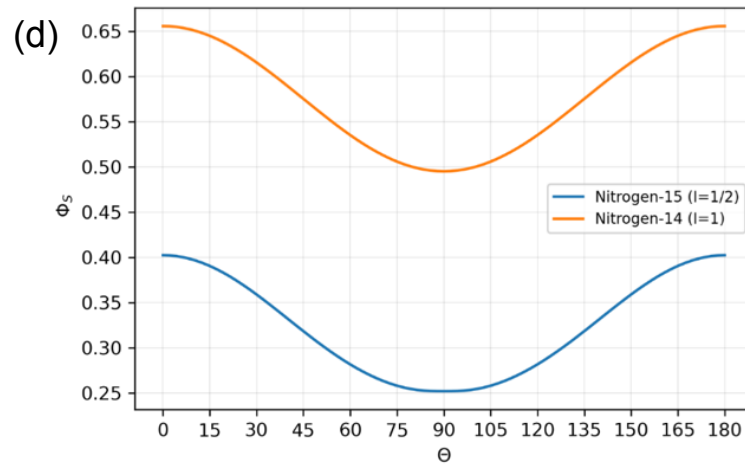

Singlet Yield vs Theta (N10 + H6) in  $FAD^-$ 

Figure 6

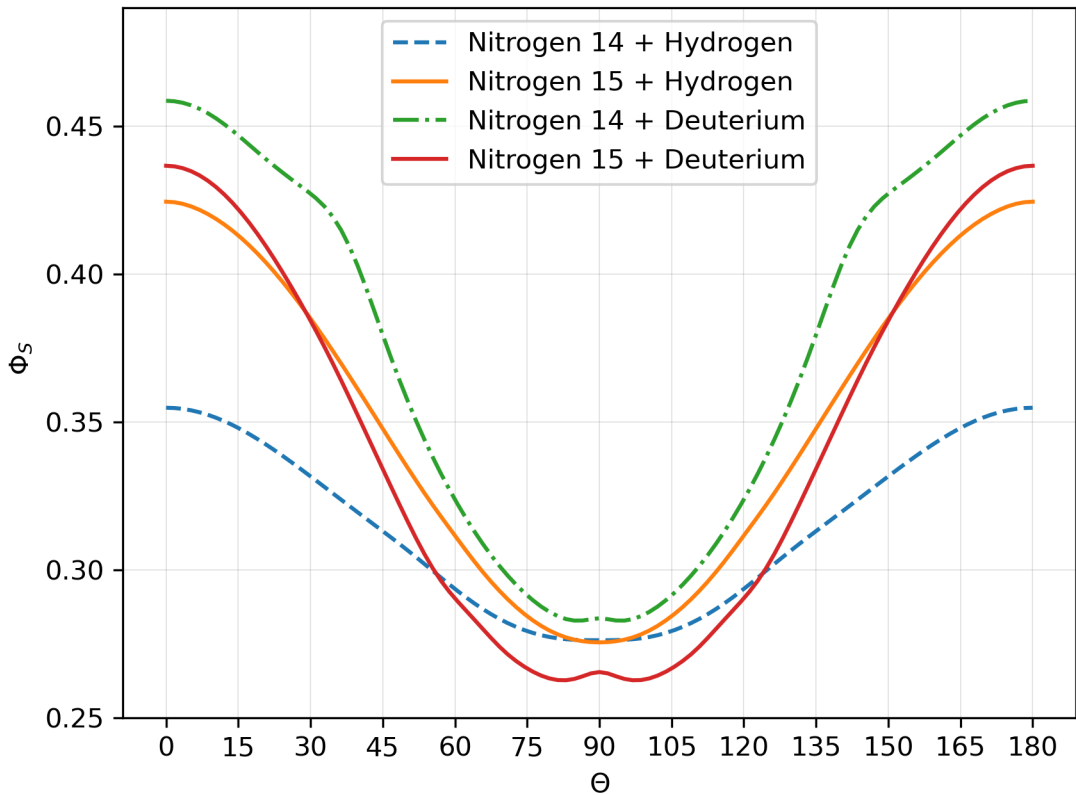

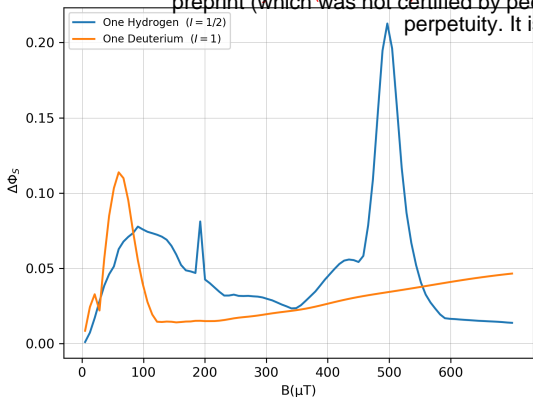

Sensitivity vs B (N1 in  $\text{TrpH}^+$ )

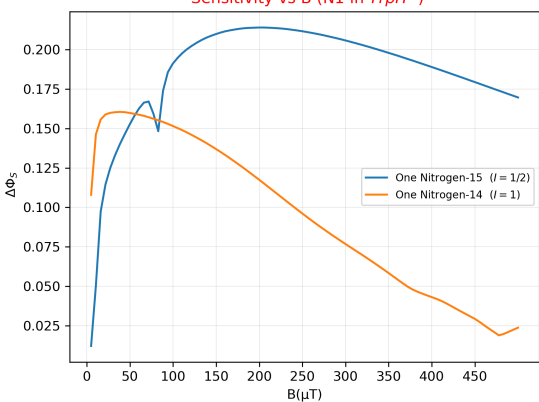

Sensitivity vs B (H1 in  $\text{TrpH}^+$ )

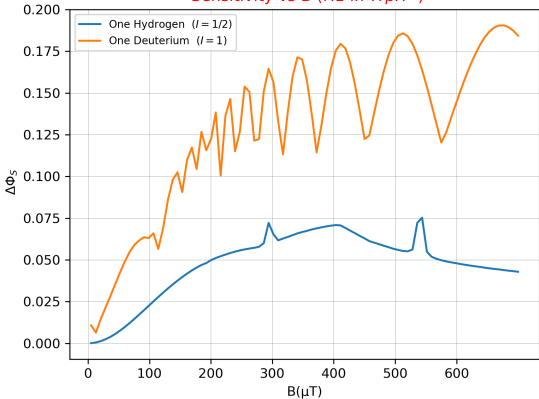

Sensitivity vs B (N10 in  $\text{FAD}^-$ )

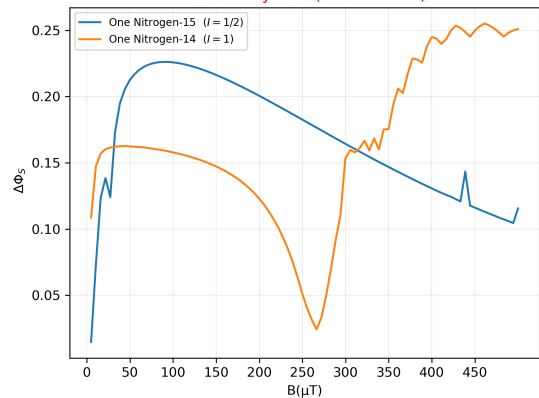

Source: https://www.biorxiv.org/content/10.1101/2022.08.08.503164v2.full.pdf
